# Supplementary material
Source: publisher figshare collection journal article supplement (https://acs.figshare.com/ndownloader/files/15639119)
Supplement: Supplementary file 1 [file 15639119]

# Supporting Information

## **Electrochemical Performance of Large Grained NaCrO<sub>2</sub> Cathode Materials for Na-ion Batteries Synthesized by Decomposition of Na<sub>2</sub>Cr<sub>2</sub>O<sub>7</sub>•2H<sub>2</sub>O**

Yong Wang<sup>1</sup>, Wei Li<sup>1</sup>, Guorong Hu<sup>1</sup>, Zhongdong Peng<sup>1</sup>, Yanbing Cao<sup>1</sup>, Hongcai Gao<sup>2</sup>, Ke Du<sup>1,\*</sup>, John B Goodenough<sup>2,\*</sup>

<sup>1</sup>: School of Metallurgy and Environment, Central South University, Changsha 410083, P. R. China

<sup>2</sup>: Texas Materials Institute and Materials Science and Engineering Program, The University of Texas at Austin, Austin, USA

**Synthesis of s-NCO:** First, a stoichiometric amount of  $\text{Na}_2\text{CO}_3$  (5% excess) and  $\text{Cr}_2\text{O}_3$  were thoroughly mixed by ball-milling with ethanol as dispersing agent. Then, the mixture was calcined in an alumina crucible at 900 °C in Ar atmosphere for 10 h hours to obtain s-NCO.

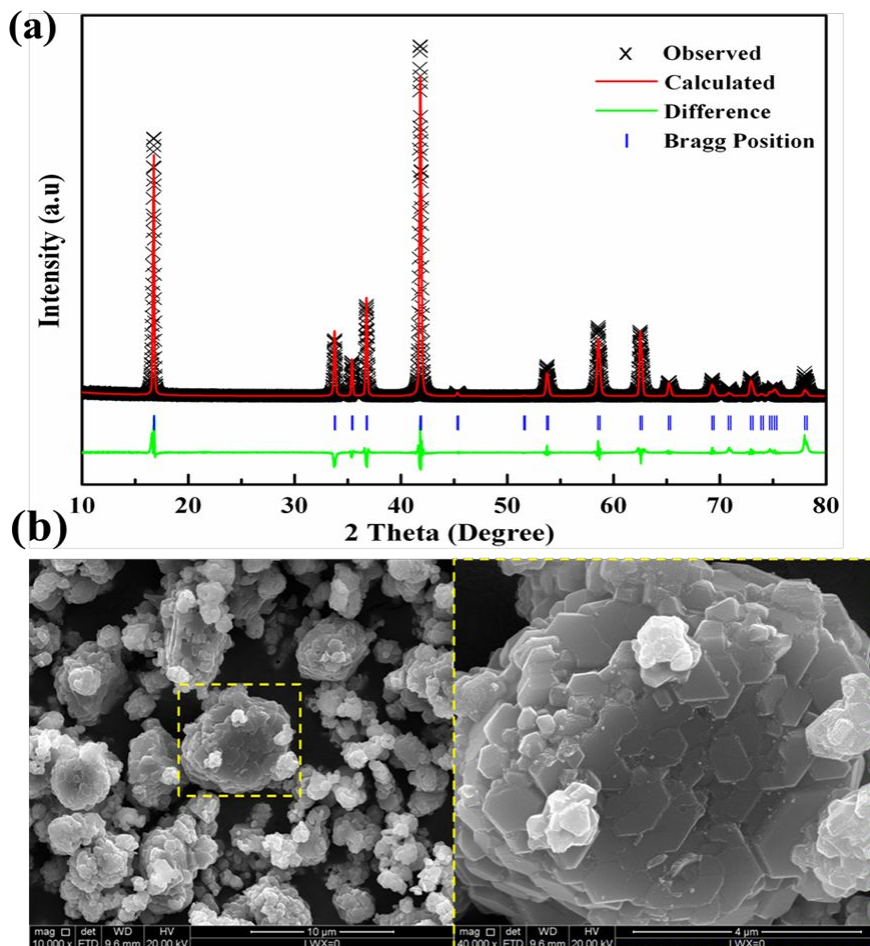

**Figure S1.** (a) Results of the Rietveld refinement on a powder X-ray diffraction pattern of  $\text{NaCrO}_2$  synthesized by traditional solid-state reaction (s-NCO). (b) SEM images of s-NCO particles at different resolutions.

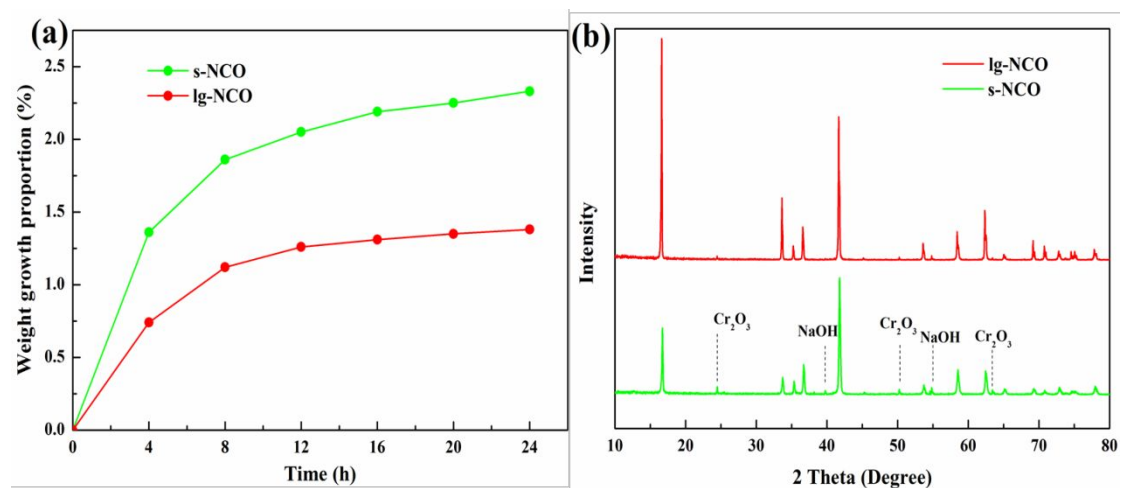

**Figure S2.** (a) Mass change rate of s-NCO and lg-NCO obtained in ambient air over 24 h. (b) XRD patterns of s-NCO and lg-NCO after exposure to ambient air for 24h.

**Table S1.** Parameters obtained by the Rietveld refinement of lg-NCO and s-NCO.

| Sample | a(Å)    | c(Å)     | V (Å <sup>3</sup> ) | Rwp    |
|--------|---------|----------|---------------------|--------|
| lg-NCO | 2.97334 | 15.97563 | 122.35              | 0.0860 |
| s-NCO  | 2.97429 | 15.97655 | 122.40              | 0.0964 |

**Table S2.** The particle size, specific area and tap density of lg-NCO and s-NCO powder.

|        | D50/μm | BET/m <sup>2</sup> /g | TD/ g•cm <sup>3</sup> |
|--------|--------|-----------------------|-----------------------|
| lg-NCO | 22.10  | 1.65                  | 2.55                  |
| s-NCO  | 2.157  | 13.69                 | 1.57                  |

**Table S3.** A comparison of some recently reported NaCrO<sub>2</sub> materials (1 C=100 mA g<sup>-1</sup>).

| Materials                                                                               | Capacity retention | Capacity<br>[mAh g <sup>-1</sup> ] | Rate<br>[mAh g <sup>-1</sup> ] | Voltage<br>range<br>[V] |
|-----------------------------------------------------------------------------------------|--------------------|------------------------------------|--------------------------------|-------------------------|
| C-NaCrO <sub>2</sub> <sup>[18]</sup>                                                    | 93%/40 cycles      | 118/0.05C                          | 0.25C(85)                      | 2.6-3.4                 |
| C-NaCrO <sub>2</sub> <sup>[19]</sup>                                                    | 96%/50 cycles      | 121/0.2C                           | 55C(106)                       | 2.0-3.6                 |
| Bare NaCrO <sub>2</sub> <sup>[19]</sup>                                                 | 80%/50 cycles      | 112/0.2C                           | 21C(15)                        | 2.0-3.6                 |
| Bare NaCrO <sub>2</sub> <sup>[15]</sup>                                                 | Not reported       | 110/0.25C                          | Not reported                   | 2.0-3.6                 |
| Bare NaCrO <sub>2</sub> <sup>[11]</sup>                                                 | 77%/50 cycles      | 110/0.125C                         | Not reported                   | 2.5-3.6                 |
| Bare NaCrO <sub>2</sub> <sup>[21]</sup>                                                 | 95%/45 cycles      | 99/0.3C                            | Not reported                   | 2.0-3.6                 |
| Na <sub>0.95</sub> Cr <sub>0.95</sub> Ti <sub>0.05</sub> O <sub>2</sub> <sup>[16]</sup> | 80%/800 cycles     | 104/0.1C                           | 30C(67)                        | 2.3-3.6                 |
| Bare NaCrO <sub>2</sub> (this work)                                                     | 94%/80 cycles      | 123/0.1C                           | 25C(51)                        | 2.3-3.6                 |

**Table S4.** Comparison of Na ions diffusion coefficients of various cathode materials.

| Materials                                                                                                | Na ions diffusion coefficients (cm <sup>2</sup> s <sup>-1</sup> ) |
|----------------------------------------------------------------------------------------------------------|-------------------------------------------------------------------|
| NaCrO <sub>2</sub> (this work)                                                                           | 2.33×10 <sup>-11</sup>                                            |
| Na <sub>0.95</sub> Cr <sub>0.95</sub> Ti <sub>0.05</sub> O <sub>2</sub> <sup>[16]</sup>                  | 2.27×10 <sup>-12</sup>                                            |
| NaFe <sub>0.45</sub> Co <sub>0.5</sub> Mg <sub>0.05</sub> O <sub>2</sub> <sup>[28]</sup>                 | 1.15×10 <sup>-10</sup>                                            |
| Na(NiCoFeTi) <sub>0.25</sub> O <sub>2</sub> <sup>[29]</sup>                                              | 1.64×10 <sup>-11</sup>                                            |
| NaNi <sub>0.5</sub> Mn <sub>0.5</sub> O <sub>2</sub> <sup>[30]</sup>                                     | 1.99×10 <sup>-12</sup>                                            |
| NaMn <sub>1/3</sub> Fe <sub>1/3</sub> Cu <sub>1/6</sub> Mg <sub>1/6</sub> O <sub>2</sub> <sup>[31]</sup> | 2.74×10 <sup>-14</sup>                                            |
| NaMn <sub>0.5</sub> Ni <sub>0.2</sub> Fe <sub>0.3</sub> O <sub>2</sub> <sup>[3]</sup>                    | 1.63×10 <sup>-12</sup>                                            |
